# Supplementary material for: Inhibitory effect of SLIT2 on granulosa cell proliferation mediated by the CDC42-PAKs-ERK1/2 MAPK pathway in the prehierarchical follicles of the chicken ovary
Source: PubMed Central journal article supplement (PMC6003946; doi:10.1038/s41598-018-27601-z), 2018-06-15

Inhibitory effect of SLIT2 on granulosa cell proliferation mediated by CDC42-PAKs-ERK1/2 MAPK pathway in the prehierarchical follicles of chicken ovary

**Rifu Xu<sup>1,2,\*,+</sup>, Ning Qin<sup>1,2,+</sup>, Xiaoxing Xu<sup>1</sup>, Xue Sun<sup>1</sup>, Xiaoxia Chen<sup>1</sup> & Jinghua Zhao<sup>1</sup>**

1. Department of Animal Genetics, Breeding and Reproduction, College of Animal Science and Technology, Jilin Agricultural University, Changchun 130118, People's Republic of China

2. Key Laboratory of Animal Production and Product Quality Safety of Ministry of Education, Changchun 130118, People's Republic of China

**\*Corresponding author:**

Correspondence and requests for materials should be addressed to R. F. Xu (E-mail: poultryxu@jlau.edu.cn)

**+ These authors contributed equally to this work.**

**SUPPLEMENTARY INFORMATION FILE**

**Supplementary Table S1.** Primer pairs used for the construction of the recombinant plasmid

| Gene         | Recombinant vector | Primer pairs (the forward and reverse, 5' - 3')                                      | Restriction sites |
|--------------|--------------------|--------------------------------------------------------------------------------------|-------------------|
| <i>SLIT2</i> | pUC57-Simple-SLIT2 | Forward:<br>5'-<br><i>CCGCTCGAGCGGATGATGTGCGCCTGGGGGAGGCT-</i><br>3'                 | Xho I             |
|              |                    | Reverse: 5'-<br><i>AGCTTGTTTAAACGGCGCGCCGGTTAGGAGGGACAA</i><br><i>TTGTACAGCC-</i> 3' | Pme I             |

Note: The underlined nucleotides indicated the location corresponding to each of the restriction sites. The SLIT2 primers were shown in italics.

**Supplementary Table S2.** siRNA sequences selected for interference with the targeted genes

| Target gene  | siRNA sequence (the forward, 5' - 3') | Start position (nt) | Reference sequence |
|--------------|---------------------------------------|---------------------|--------------------|
| <i>SLIT2</i> | GGAAATAACATCACCAGAATT                 | 546                 | NM_001267075.1     |
| <i>ROBO1</i> | GTTGAACACCCATCTGATTTA                 | 77                  | AF364047.1         |
| <i>ROBO2</i> | GAGAACCAACAACCCTGA ACT                | 910                 | XM_416674.4        |
| <i>B-RAF</i> | GAGCATAACCCACCATCAATA                 | 244                 | NM_205302.1        |
| <i>RAF1</i>  | GTGCGAAATGGGATGACCTTA                 | 284                 | NM_205307.2        |
| <i>PAK1</i>  | GGAGTTGAAACAGAAGACAAA                 | 111                 | NM_001162372.3     |
| <i>PAK2</i>  | GTTGCTACAGACCTCAAACAT                 | 438                 | XM_004936995.2     |
| <i>PAK3</i>  | GAATCCTCAAGCAGTTCTAGA                 | 526                 | XM_015278599.1     |

**Supplementary Table S3.** Antibodies used for the Western blot analysis

| <b>Protein target</b> | <b>Primary antibody</b>    | <b>Dilution used</b> | <b>Antibody type</b> | <b>Secondary antibody</b> | <b>Dilution used</b> | <b>Originated</b>                   |
|-----------------------|----------------------------|----------------------|----------------------|---------------------------|----------------------|-------------------------------------|
| SLIT2                 | Mouse anti-SLIT2           | 1/1000               | Monoclonal           | anti-mouse IgG            | 1/1000               | Sigma, St Louis, MO, USA            |
| ROBO1                 | Mouse anti-ROBO1           | 1/2000               | Monoclonal           | anti-mouse IgG            | 1/1000               | Sigma, St Louis, MO, USA            |
| ROBO2                 | Mouse anti-ROBO2           | 1/2000               | Monoclonal           | anti-mouse IgG            | 1/1000               | Sigma, St Louis, MO, USA            |
| B-RAF                 | Rabbit anti-B-RAF          | 1/1000               | polyclonal           | anti-rabbit IgG           | 1/3000               | Sangon Co, Shanghai, China          |
| RAF1                  | Rabbit anti-RAF1           | 1/1000               | polyclonal           | anti-rabbit IgG           | 1/3000               | Sangon Co, Shanghai, China          |
| CDC42                 | Rabbit anti-CDC42          | 1/1000               | Monoclonal           | anti-rabbit IgG           | 1/2000               | Rockford, IL, USA                   |
| RAC1                  | Rabbit anti-RAC1           | 1/1000               | Monoclonal           | anti-rabbit IgG           | 1/2000               | Boster Biological Technology, China |
| PBD                   | Rabbit anti-pB-RAF         | 1/1000               | polyclonal           | anti-rabbit IgG           | 1/2000               | Sangon Co, Shanghai, China          |
| pPAK1                 | Mouse anti-pPAK1           | 1/2000               | Monoclonal           | anti-mouse IgG            | 1/3000               | Sangon Co, Shanghai, China          |
| pPAK2                 | Mouse anti-pPAK2           | 1/2000               | Monoclonal           | anti-mouse IgG            | 1/4000               | Sangon Co, Shanghai, China          |
| pPAK3                 | Mouse anti-pPAK3           | 1/2000               | Monoclonal           | anti-mouse IgG            | 1/3000               | Sangon Co, Shanghai, China          |
| pB-RAF                | Rabbit anti-pB-RAF         | 1/1000               | polyclonal           | anti-rabbit IgG           | 1/3000               | Sangon Co, Shanghai, China          |
| pRAF1                 | Rabbit anti-pRAF1          | 1/1000               | polyclonal           | anti-rabbit IgG           | 1/3000               | Sangon Co, Shanghai, China          |
| pMEK1                 | Rabbit anti-pMEK1          | 1/2000               | Monoclonal           | anti-rabbit IgG           | 1/1000               | Invitrogen, Carlsbad, CA, USA       |
| pMEK2                 | Rabbit anti-pMEK2          | 1/2000               | Monoclonal           | anti-rabbit IgG           | 1/1000               | Invitrogen, Carlsbad, CA, USA       |
| pERK1/2               | Rabbit anti-pERK1/2        | 1/2000               | Monoclonal           | anti-rabbit IgG           | 1/1000               | Invitrogen, Carlsbad, CA, USA       |
| $\beta$ -actin        | Mouse anti- $\beta$ -actin | 1/1000               | polyclonal           | anti-mouse IgG            | 1/2000               | Boster Biological Technology, China |

**Supplementary Fig. S1. Effects of SLIT2 on GC proliferation in chicken ovaries**

(A) The chicken granulosa cells were transfected with the reconstructed pYr-adshuttle-4-SLIT2 plasmids, a pYr-adshuttle-4 empty vector (negative control) or no plasmid (blank control). The effects of the SLIT2 overexpression on GC proliferation were detected by an EdU incorporation assay. All cell nuclei show blue fluorescence indicative of Hoechst 33342 staining; the EdU-labeled cells show red fluorescence indicating their newly synthesized DNA (original magnification  $\times 20$ ). (B) The GCs were transfected with SLIT2-specific siRNAs, scrambled siRNA (negative control) or no siRNA (blank control). The effects of the SLIT2 silencing on GC proliferation were detected by an EdU incorporation assay (original magnification  $\times 20$ ). BC, blank control; NC, negative control; OE, SLIT2 overexpression group; SR, SLIT2 knockdown group.

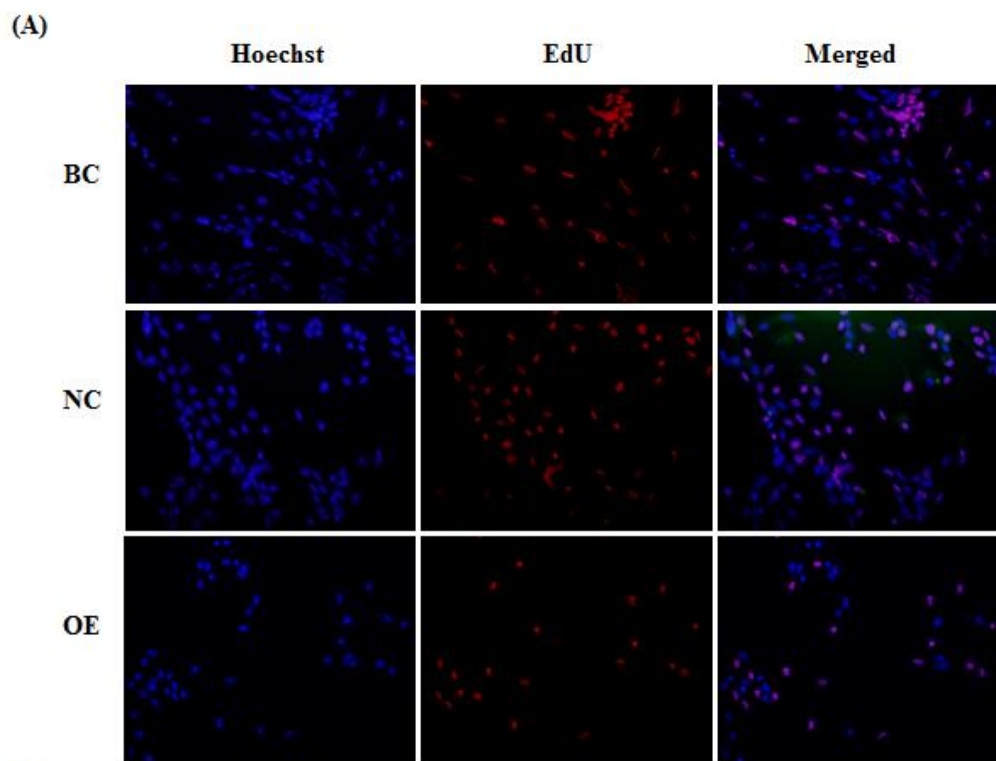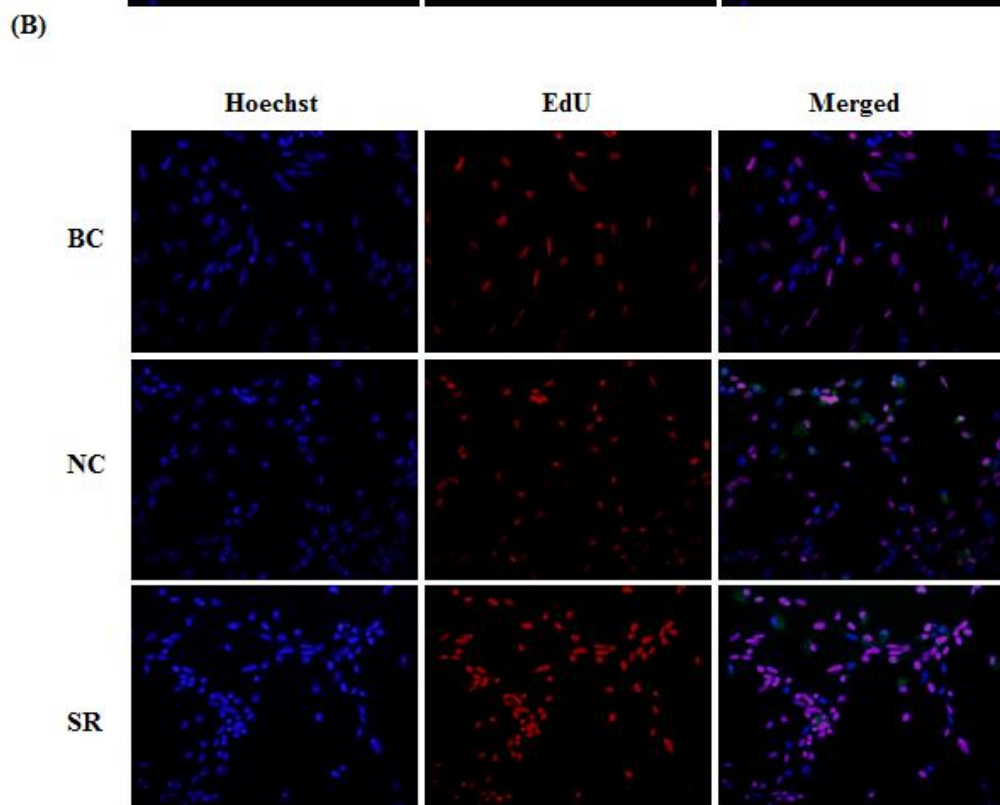

**Supplementary Fig. S2.** Effects of ROBO1 and/or ROBO2 on the SLIT2-induced inhibition of granulosa cell proliferation

In the GCs transfected with or without the reconstructed pYr-adshuttle-4-SLIT2 plasmids, the cells were co-transfected with specific ROBO1 and/or ROBO2 siRNAs. (A) GCs transfected exclusively with or without the reconstructed pYr-adshuttle-4-SLIT2 plasmids, (B) co-transfected with specific ROBO1 siRNA, (C) co-transfected with specific ROBO2 siRNA, or (D) co-transfected with both the ROBO1 and ROBO2 siRNAs. GC proliferation was examined by an EdU incorporation assay (original magnification  $\times 20$ ). NC, negative control; OE, SLIT2 overexpression group.

(A)

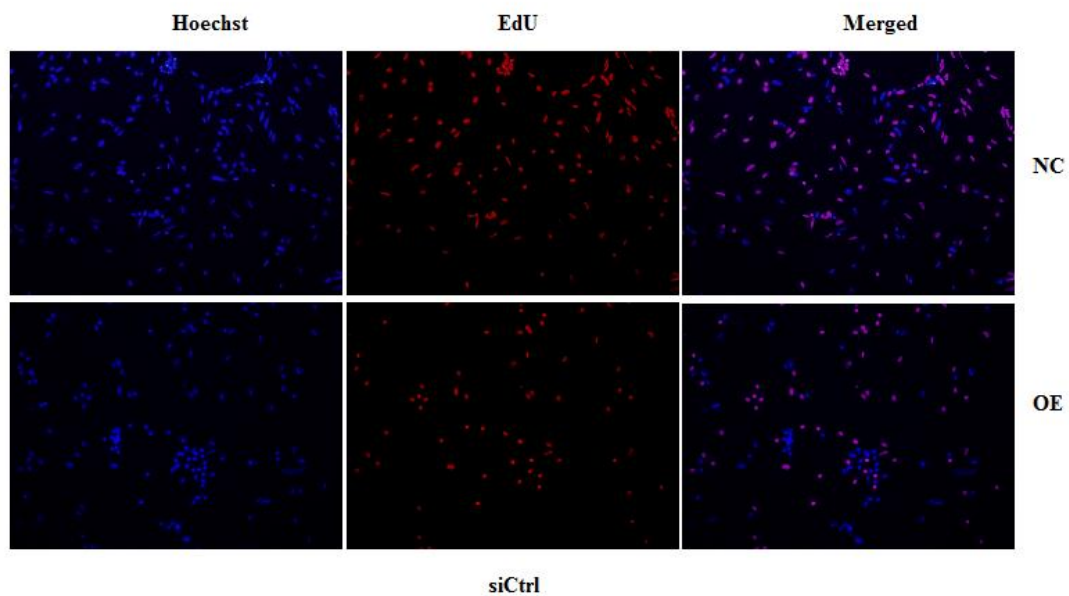

(B)

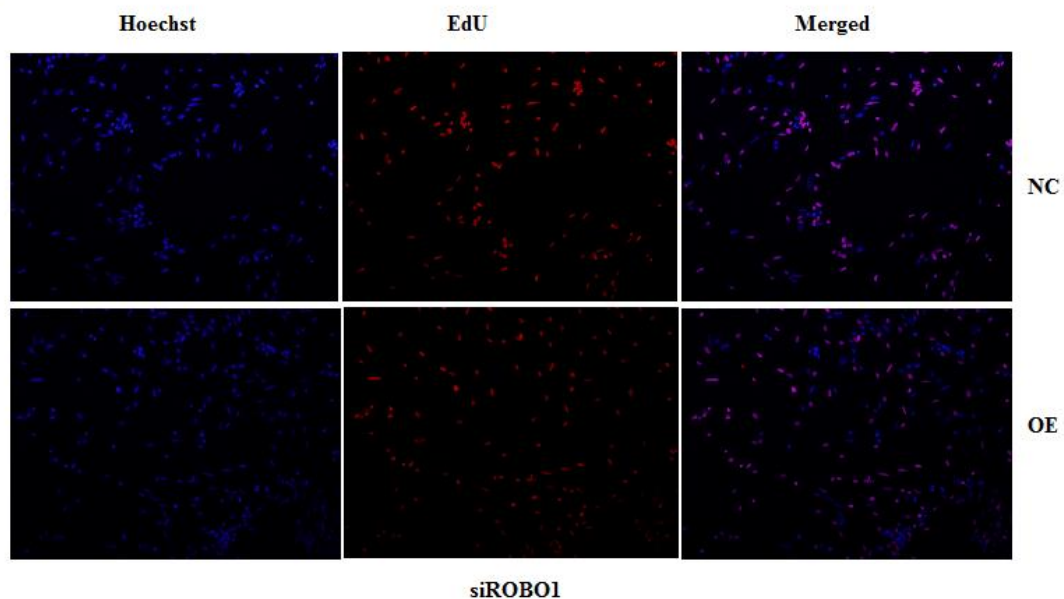

(C)

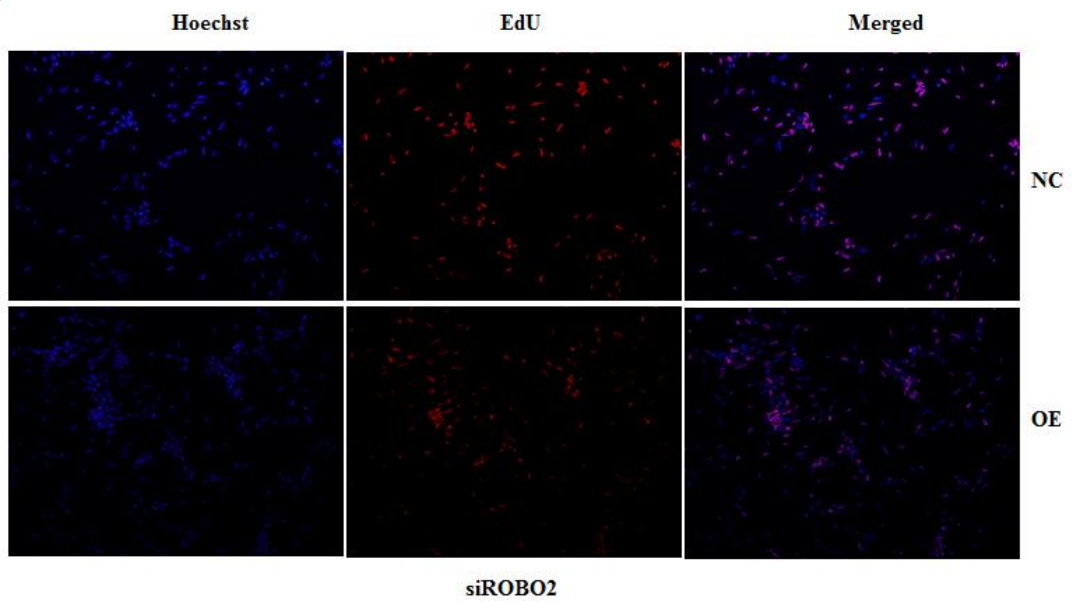

(D)

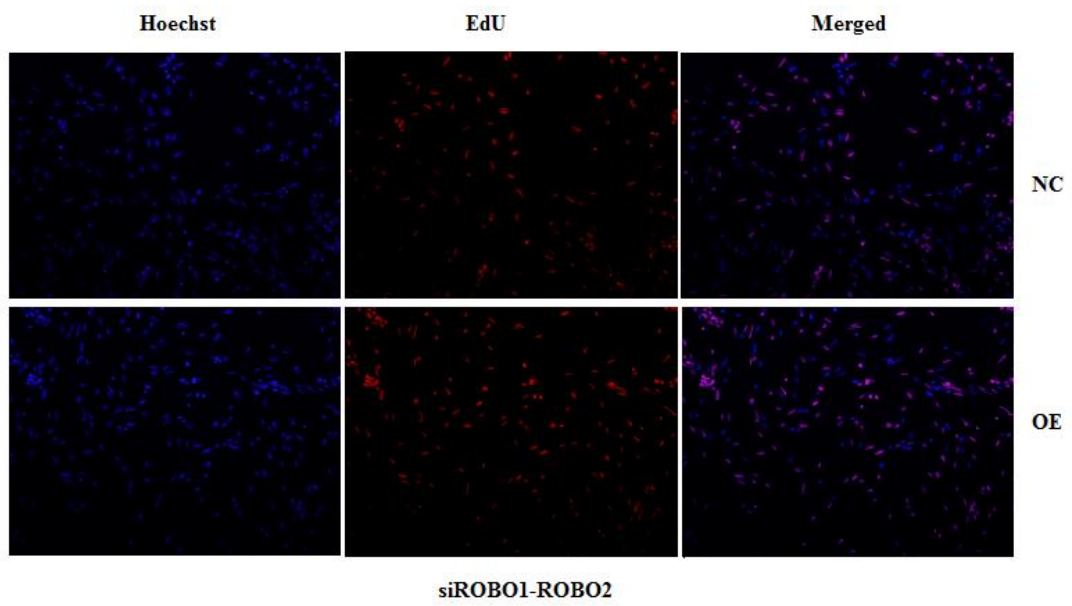

**Supplementary Figure S3.**

Original blot images in Figures 1, 2, 3, 6, 7, 8, 9 and 10.

Original images for SLIT2, ROBO1, ROBO2 and  $\beta$ -actin expression in the GCs before and after the transfection with the pYr-adshuttle-4-SLIT2 vector detected by western blotting. The manipulated versions are reported in Fig. 1 of the manuscript.

**Fig.1B-1** full blot image of SLIT2

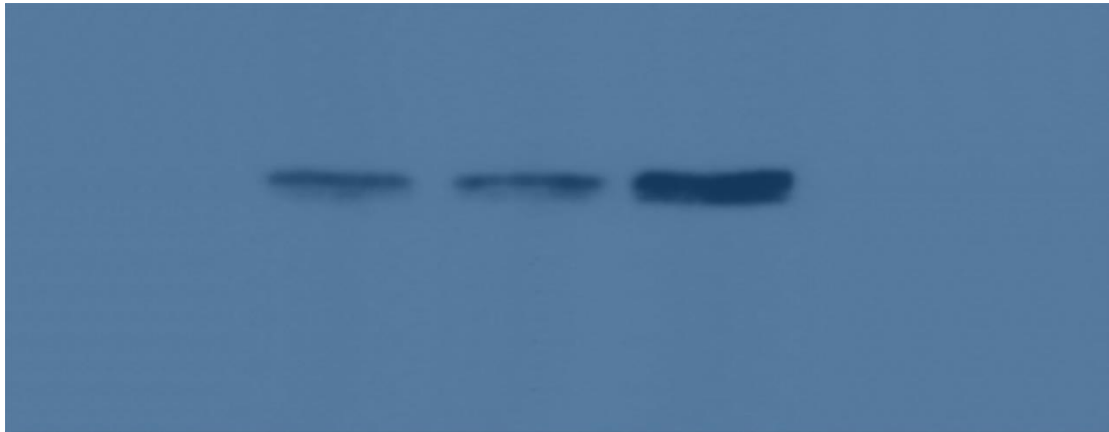

**Fig.1B-2** full blot image of beta-actin

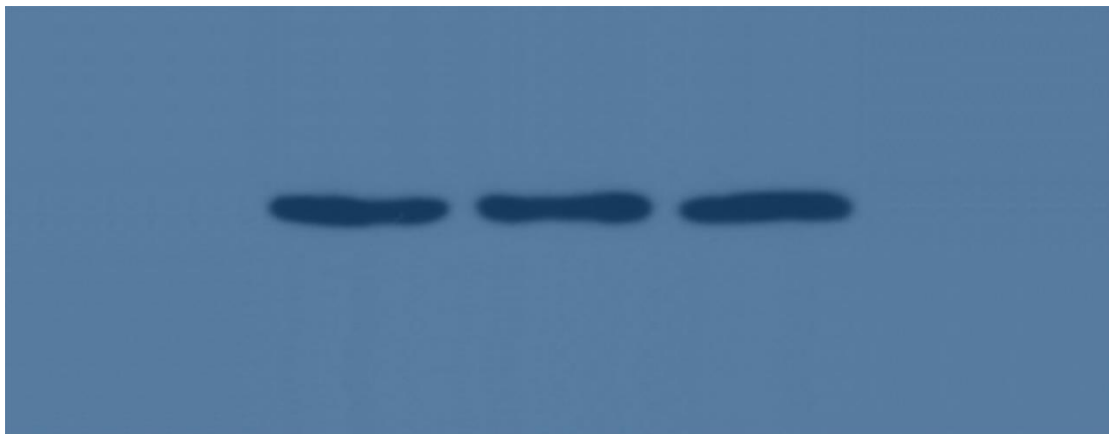

**Fig.1D-1** full blot image of ROBO1

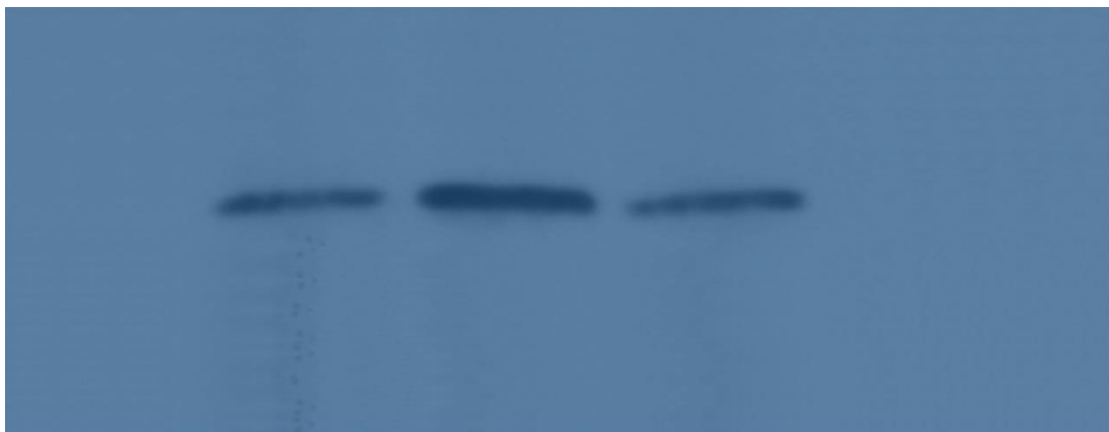



**Fig.1D-2** full blot image of ROBO2

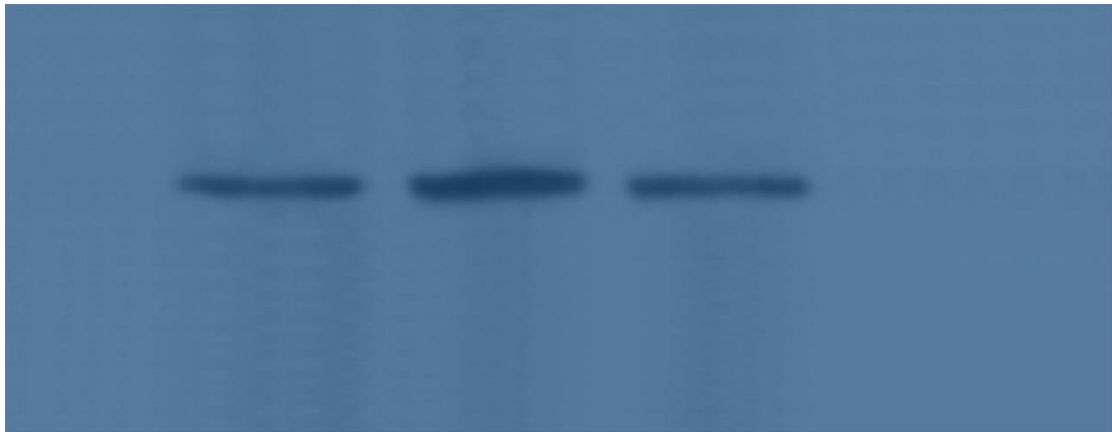

**Fig.1D-3** full blot image of beta-actin

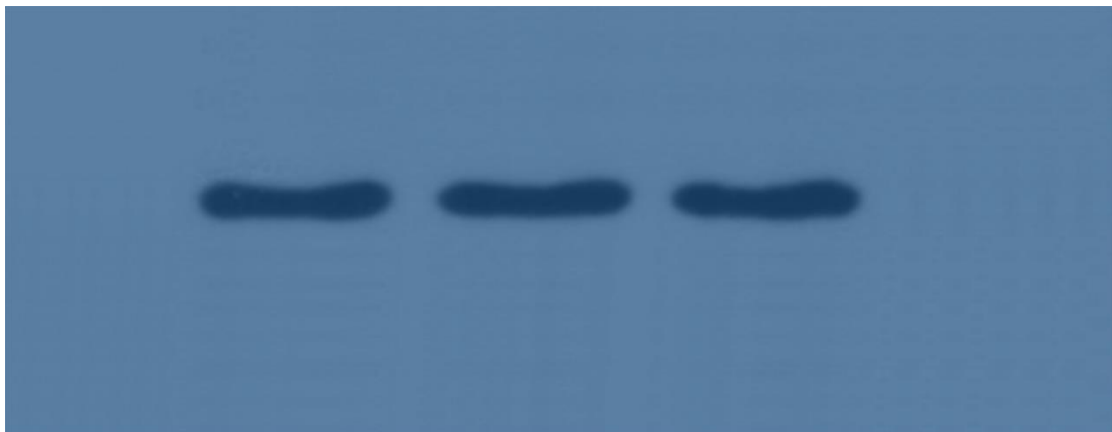

Original images for SLIT2, ROBO1, ROBO2 and  $\beta$ -actin expression in the GCs before and after the transfection with the SLIT2-specific siRNA. The manipulated versions are reported in Fig. 2 of the manuscript.

**Fig.2B-1** full blot image of SLIT2

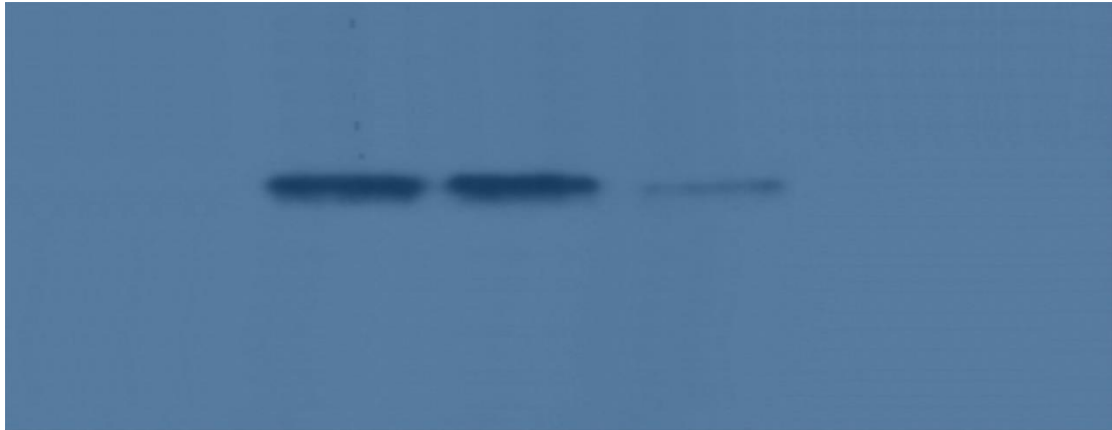

**Fig.2B-2** full blot image of beta-actin

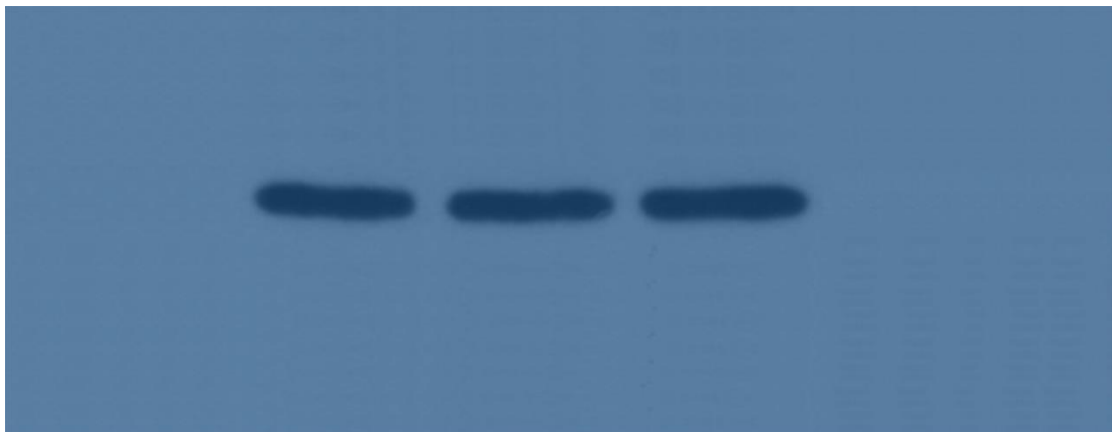

**Fig.2D-1** full blot image of ROBO1

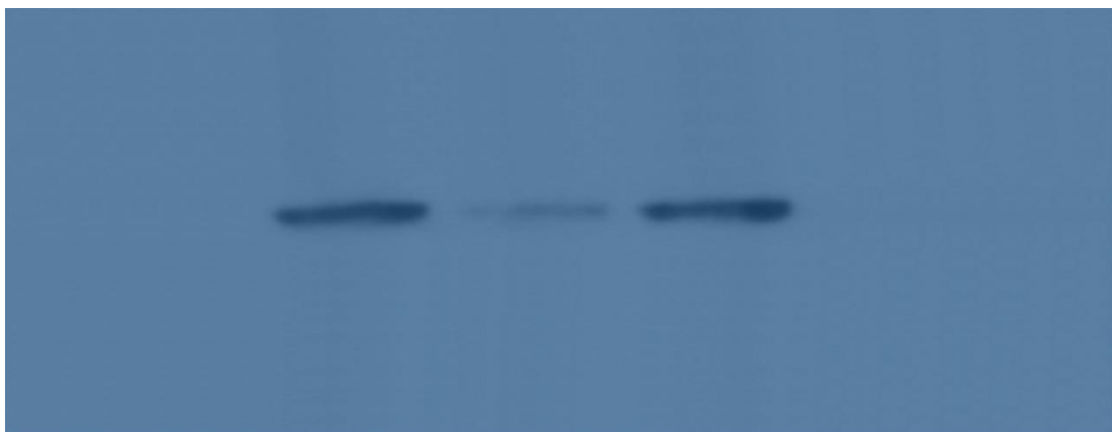

**Fig.2D-2** full blot image of ROBO2

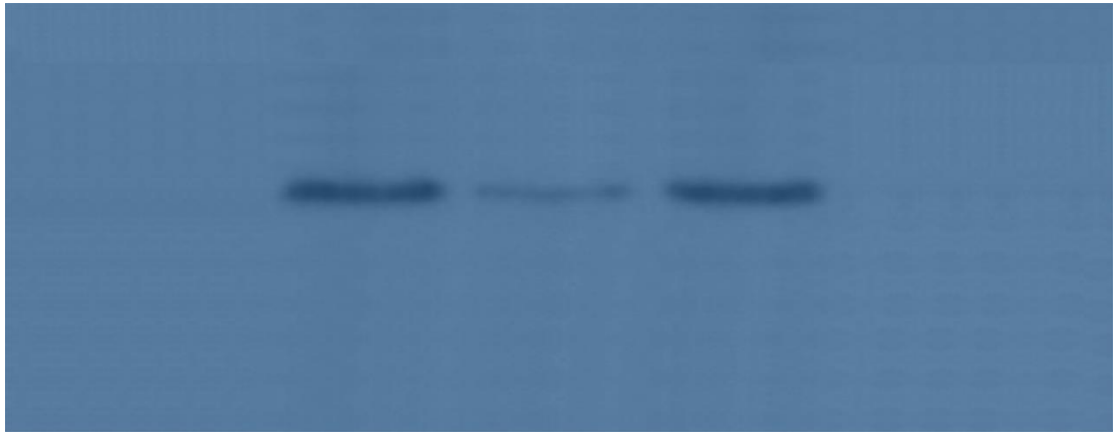

**Fig.2D-3** full blot image of beta-actin

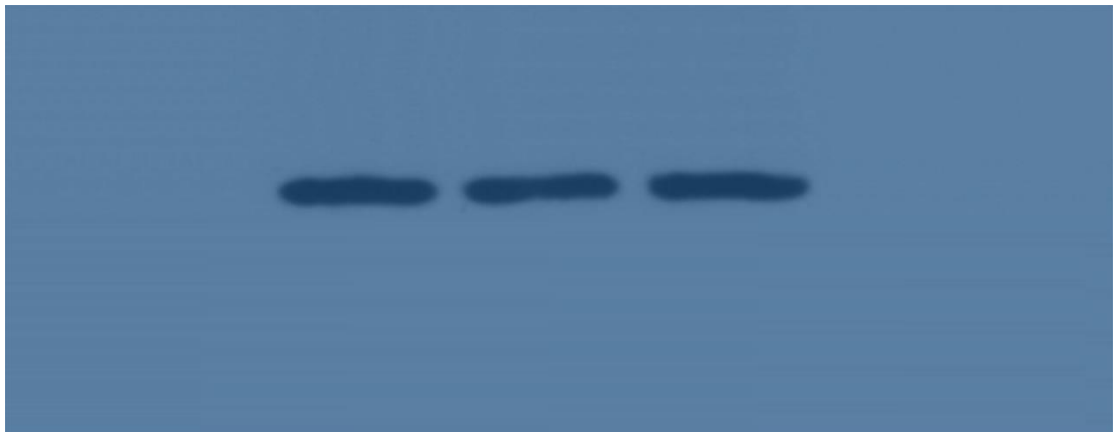

Original images for SLIT2, ROBO1 and ROBO2 protein in the GCs before and after the transfection with the pYr-adshuttle-4-SLIT2 construct determined by the coimmunoprecipitation experiment. The manipulated versions are reported in Fig. 3 of the manuscript.

**Fig.3-1** full blot image of SLIT2

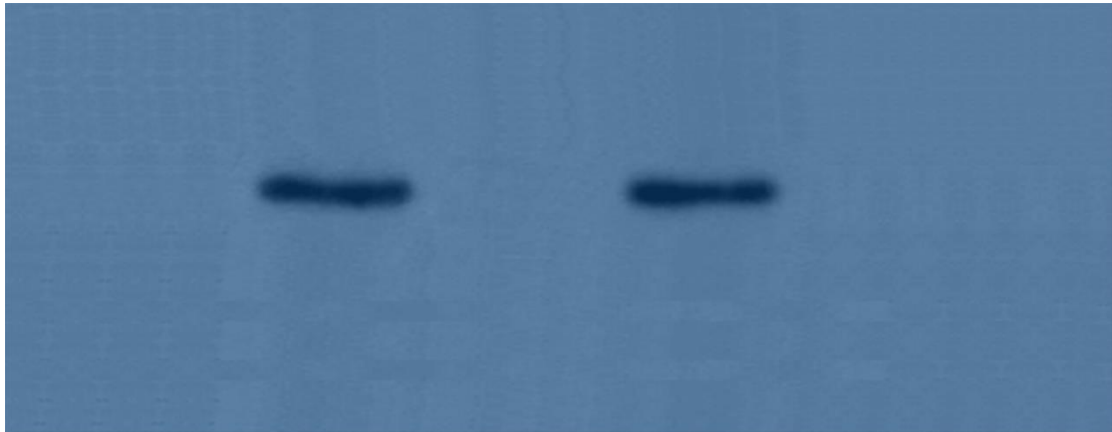

**Fig.3-2** full blot image of ROBO1

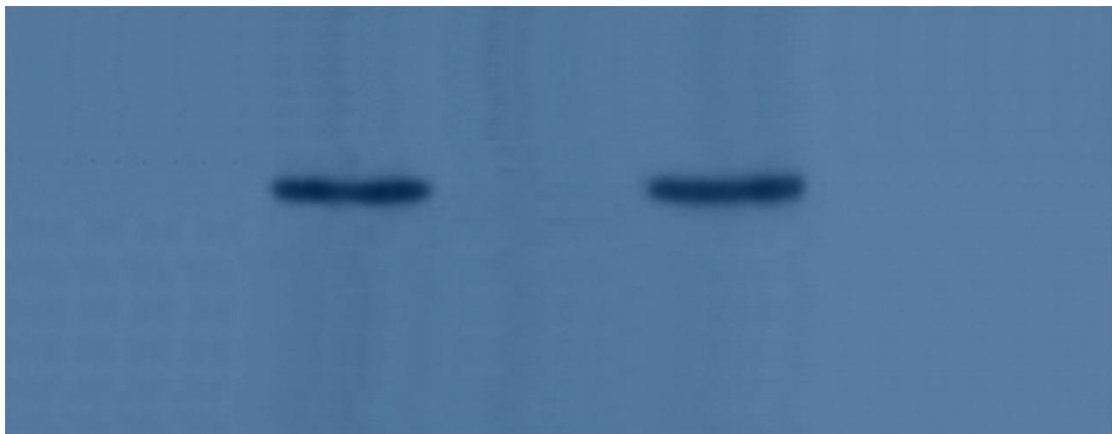

**Fig.3-3** full blot image of ROBO2

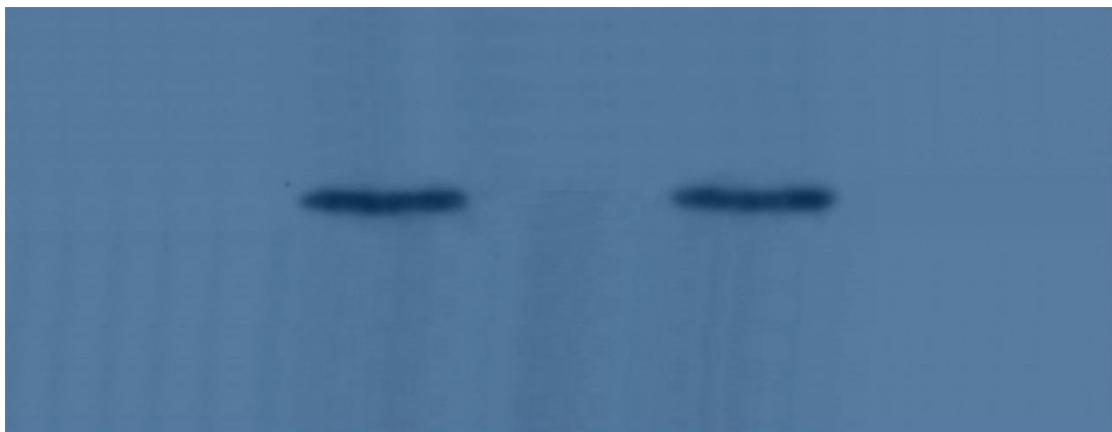

Original images for SRGAP1, GTP-CDC42, CDC42, GTP-RAC1, RAC1 and  $\beta$ -actin expression in the GCs before and after the transfection with the pYr-adshuttle-4-SLIT2 expression construct determined by the immunoblotting. The manipulated versions are reported in Fig. 6 of the manuscript.

**Fig.6B-1** full blot image of SRGAP1

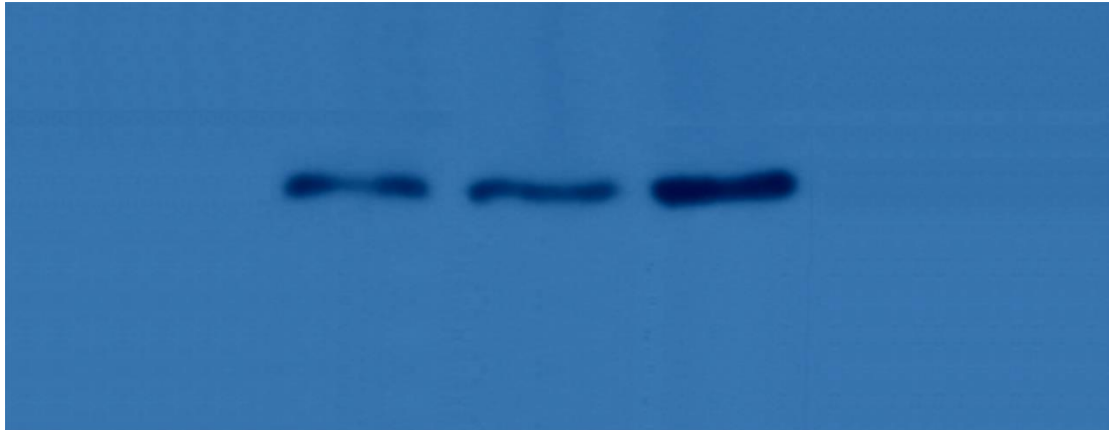

**Fig.6B-2** full blot image of beta-actin

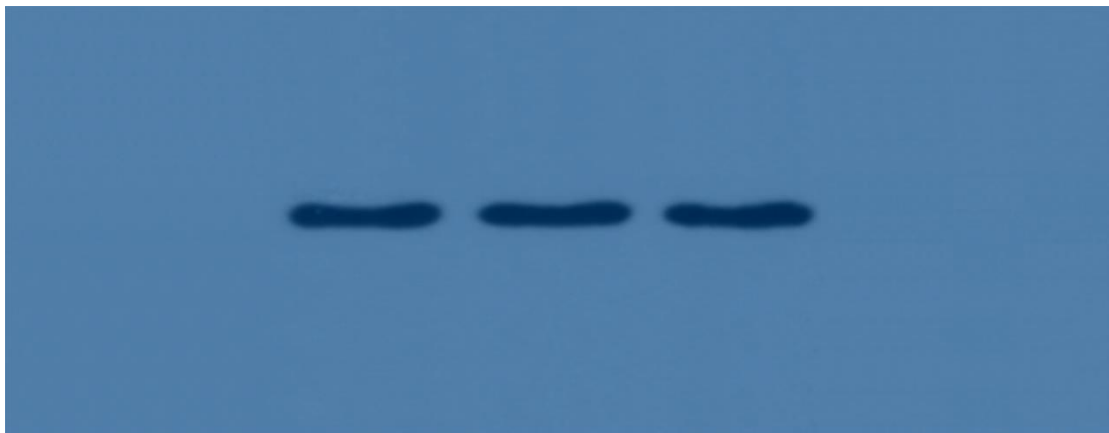

**Fig.6C-1** full blot image of GTP-CDC42

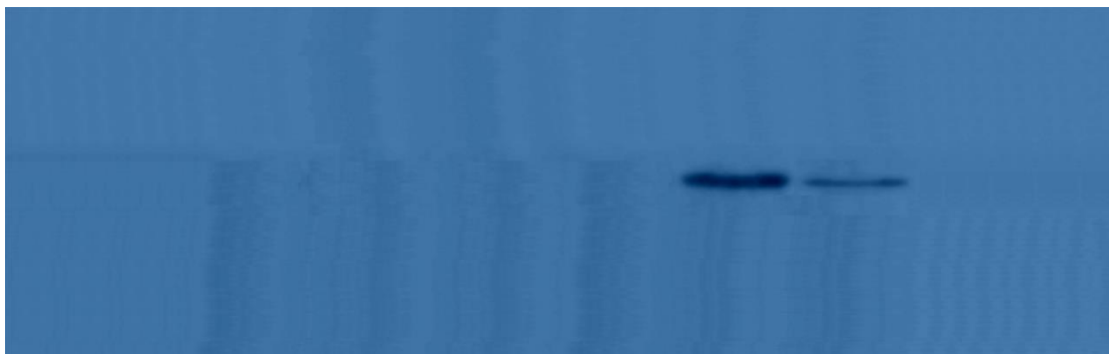

**Fig.6C-2** full blot image of total CDC42

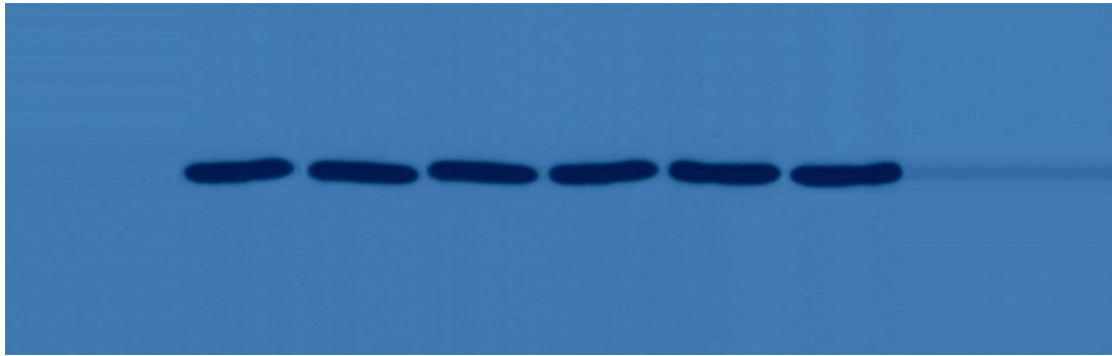

**Fig.6C-3** full blot image of GTP-RAC1

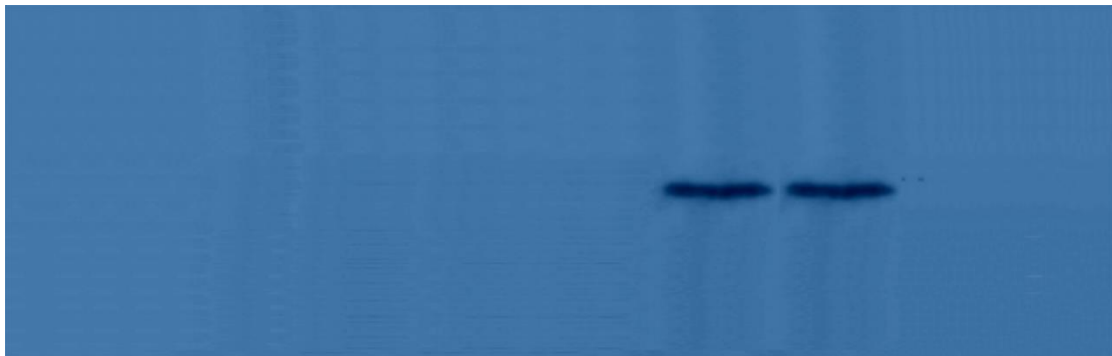

**Fig.6C-4** full blot image of total RAC1

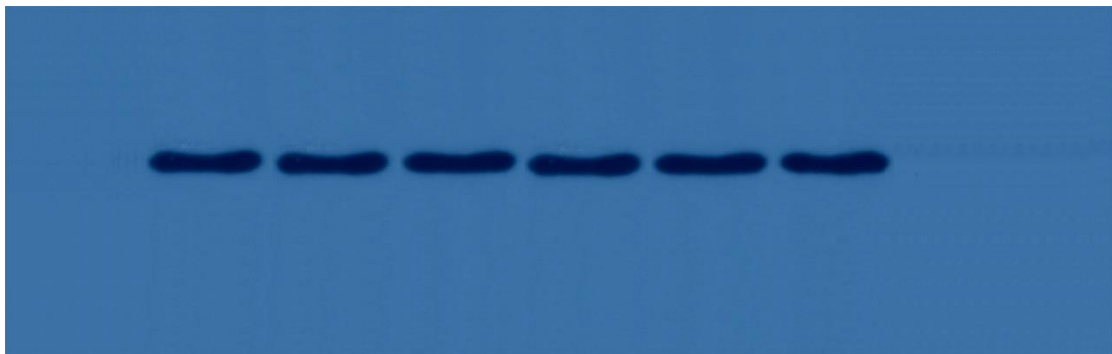

Original images for SRGAP1, GTP-CDC42, CDC42, GTP-RAC1, RAC1 and  $\beta$ -actin expression in the GCs before and after the transfection with the specific siRNAs targeting SLIT2 gene tested by the immunoblotting. The manipulated versions are reported in Fig. 7 of the manuscript.

**Fig.7B-1** full blot image of SRGAP1

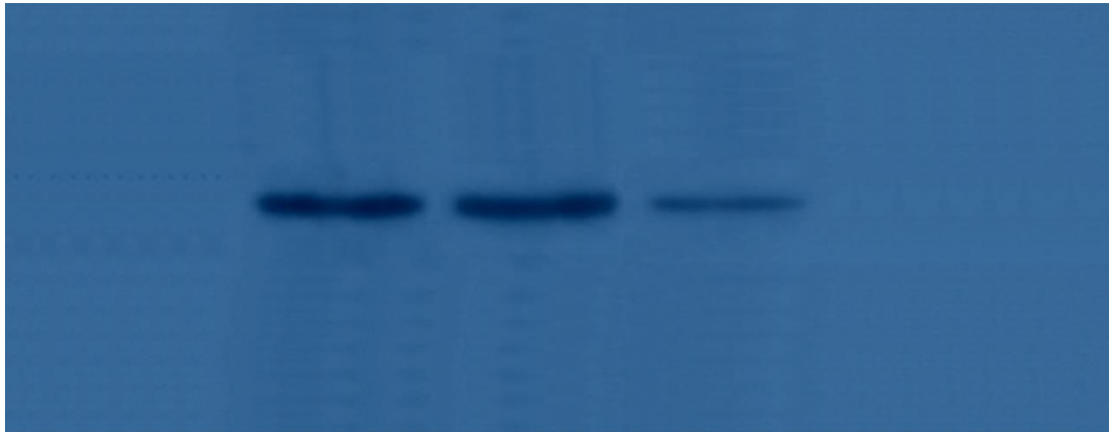

**Fig.7B-2** full blot image of beta-actin

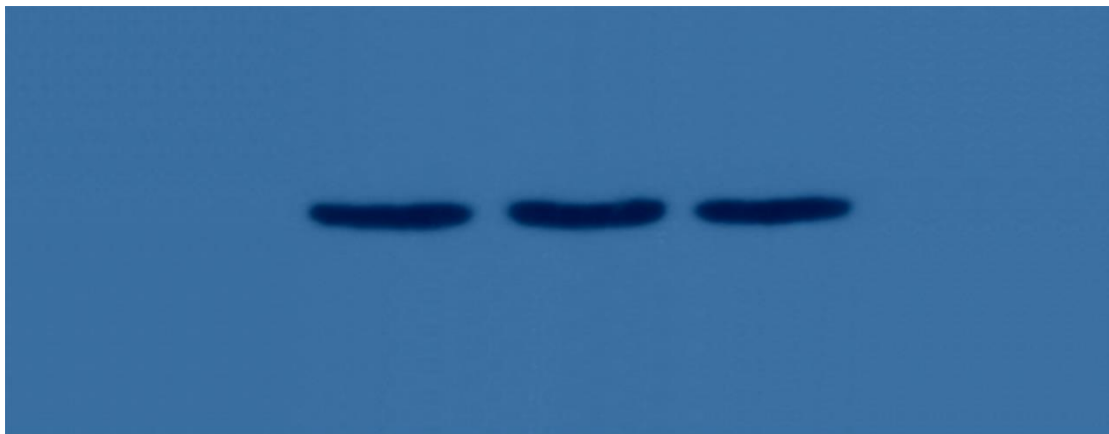

**Fig.7C-1** full blot image of GTP-CDC42

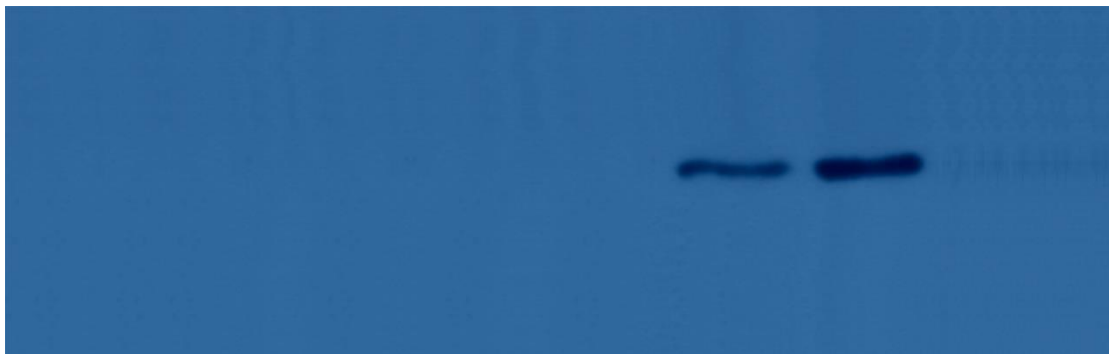

**Fig.7C-2** full blot image of total CDC42

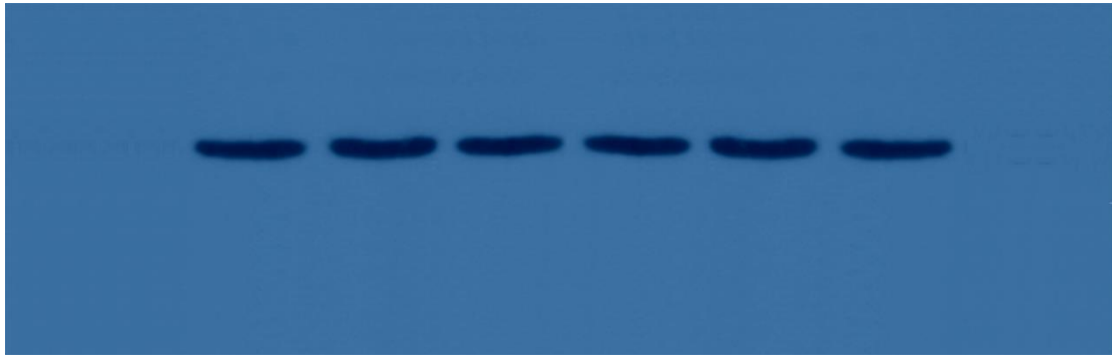

**Fig.7C-3** full blot image of GTP-RAC1

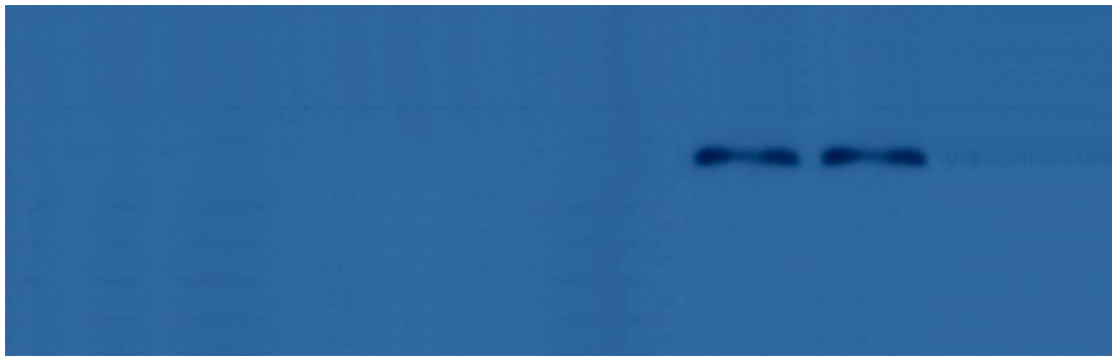

**Fig.7C-4** full blot image of total RAC1

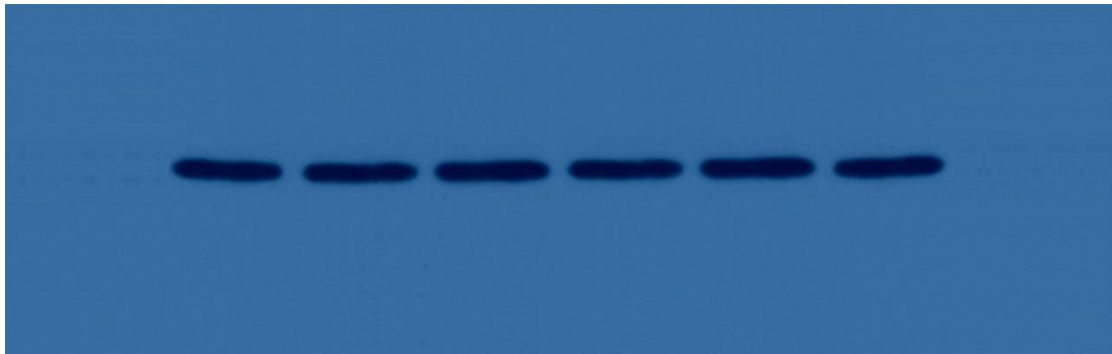



Original images for the phosphorylation levels of PAKs, RAFs and ERK1/2 in the GCs before and after the transfection with the pYr-adshuttle-4-SLIT2 construct detected by the immunoblotting. The manipulated versions are reported in Fig. 8 of the manuscript.

**Fig.8A-1** full blot image of beta-actin

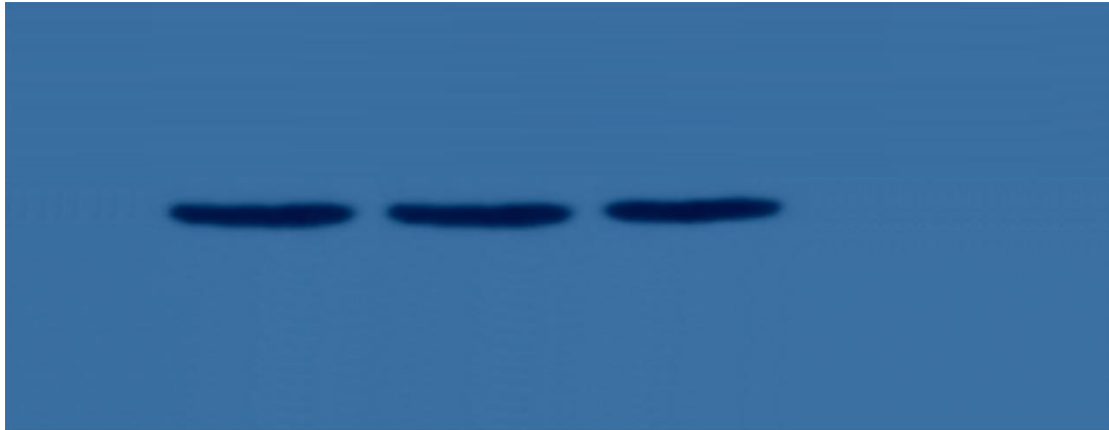

**Fig.8A-2** full blot image of PAK1

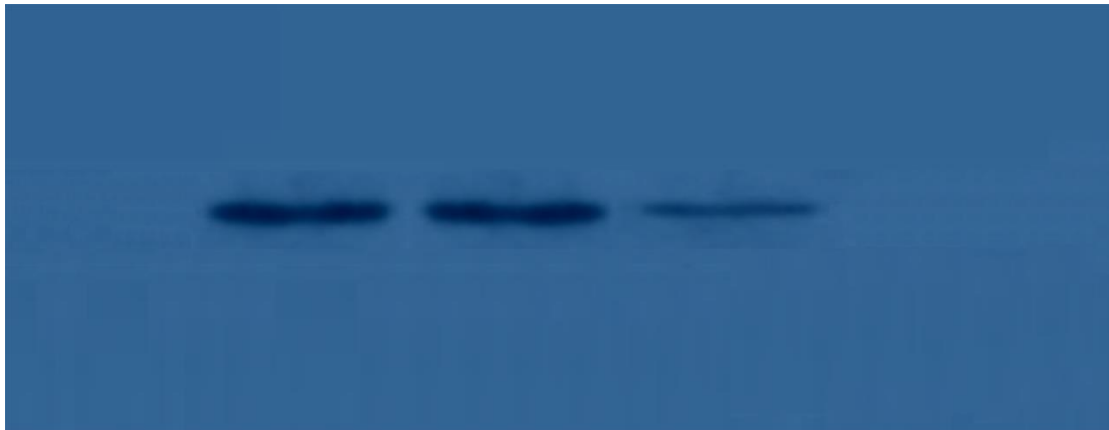

**Fig.8A-3** full blot image of PAK2

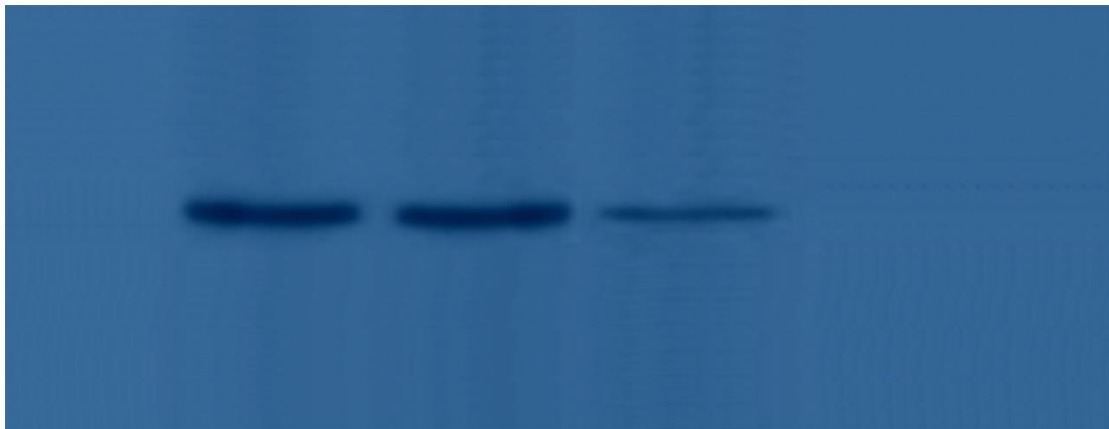

**Fig.8A-4** full blot image of PAK3

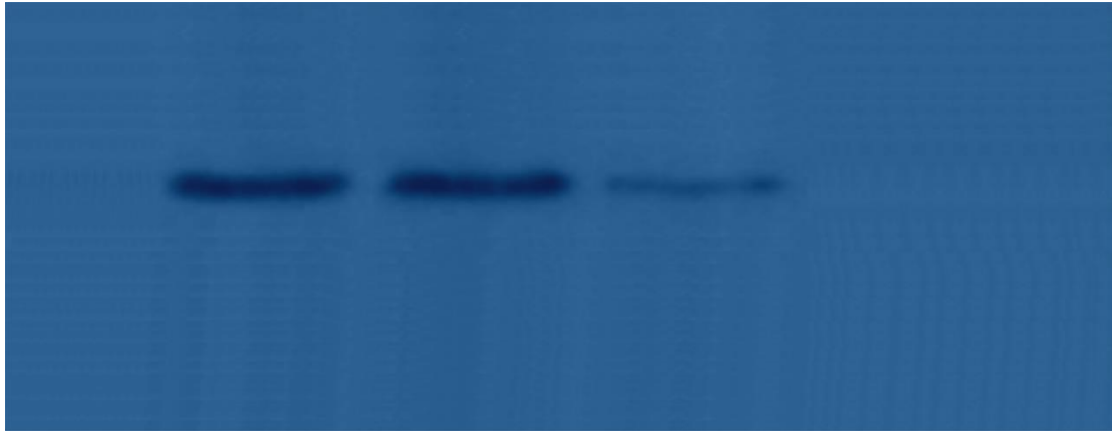

**Fig.8A-5** full blot image of B-RAF

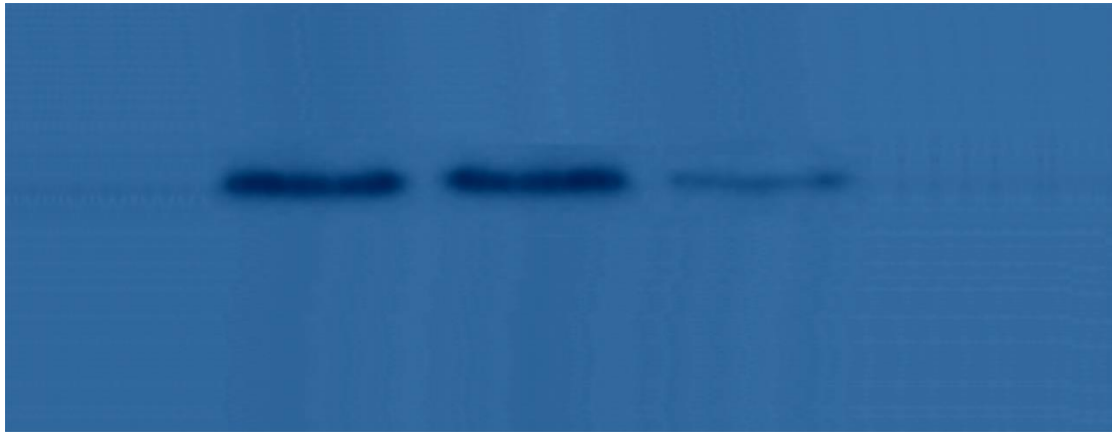

**Fig.8A-6** full blot image of RAF1

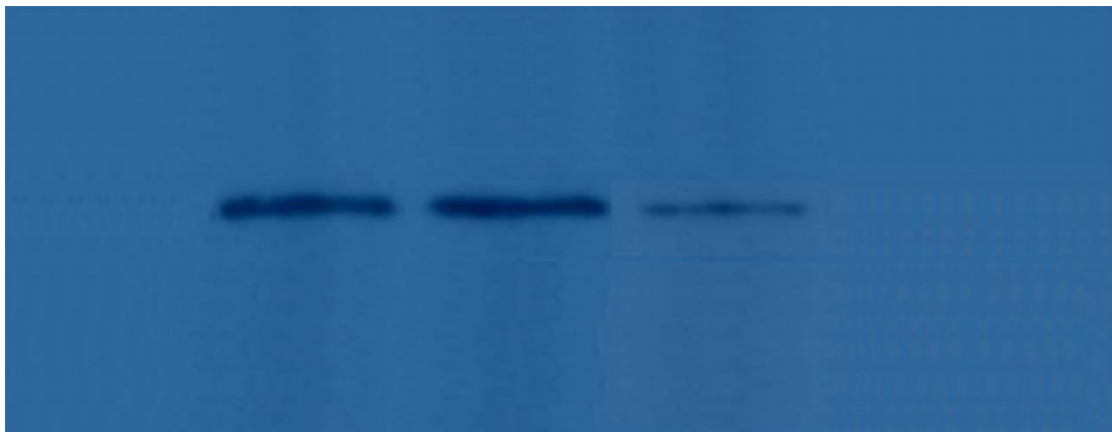

**Fig.8A-7** full blot image of MEK1

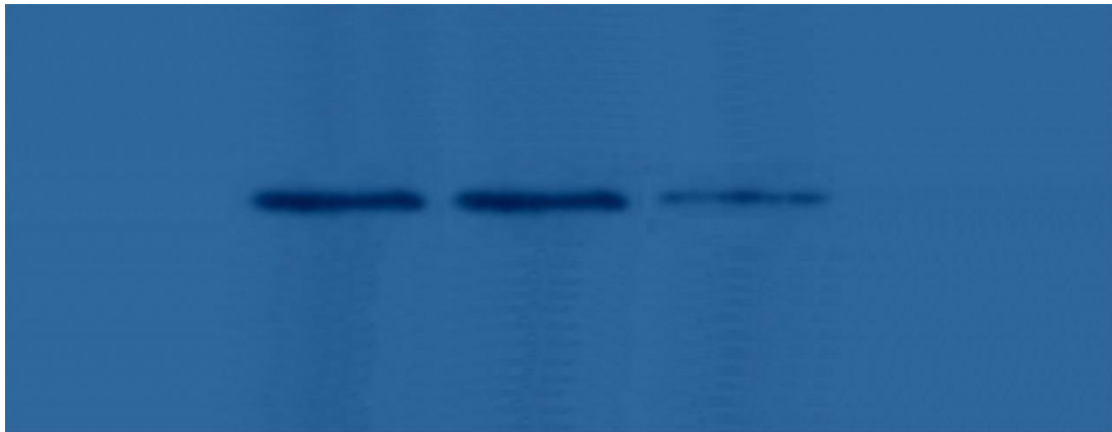

**Fig.8A-8** full blot image of MEK2

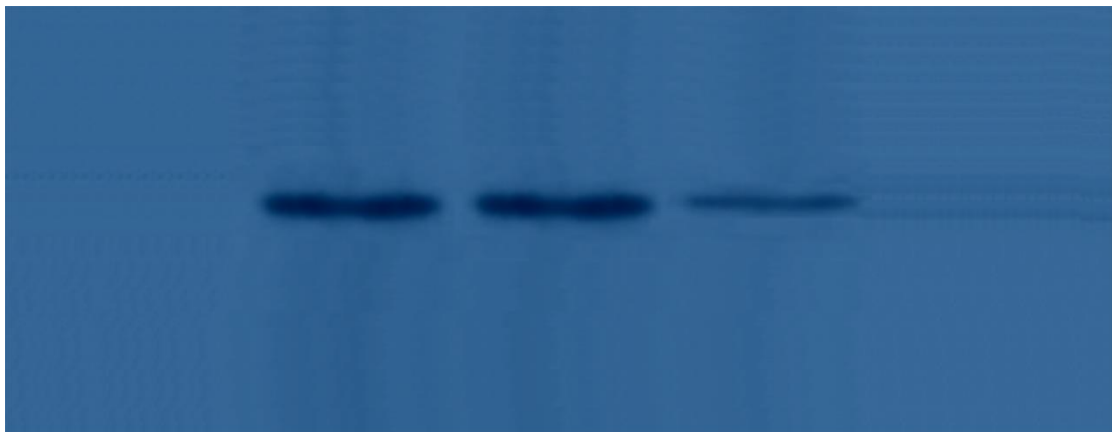

**Fig.8A-9** full blot image of ERK1/2

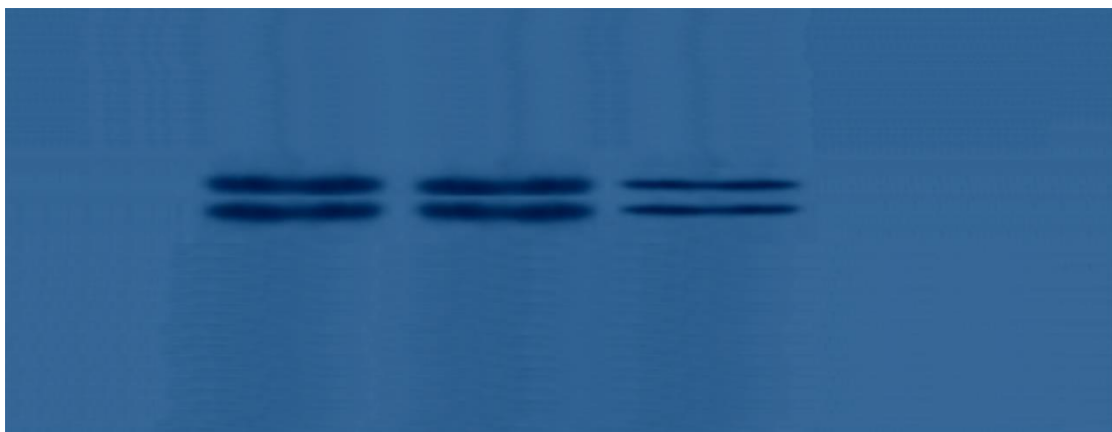

Original images for the phosphorylation levels of PAKs, RAFs and ERK1/2 in the GCs before and after the transfection with the SLIT2-specific siRNA examined by the immunoblotting. The manipulated versions are reported in Fig. 9 of the manuscript.

**Fig.9A-1** full blot image of beta-actin

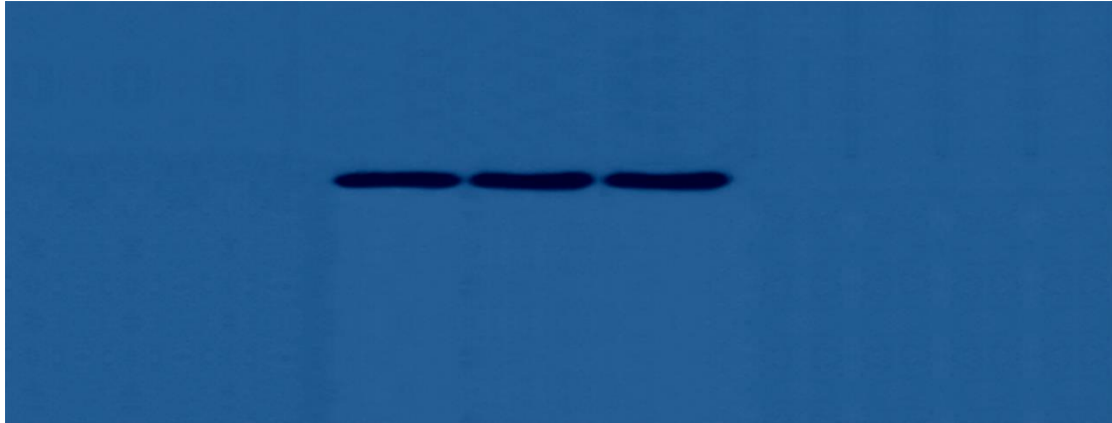

**Fig.9A-2** full blot image of PAK1

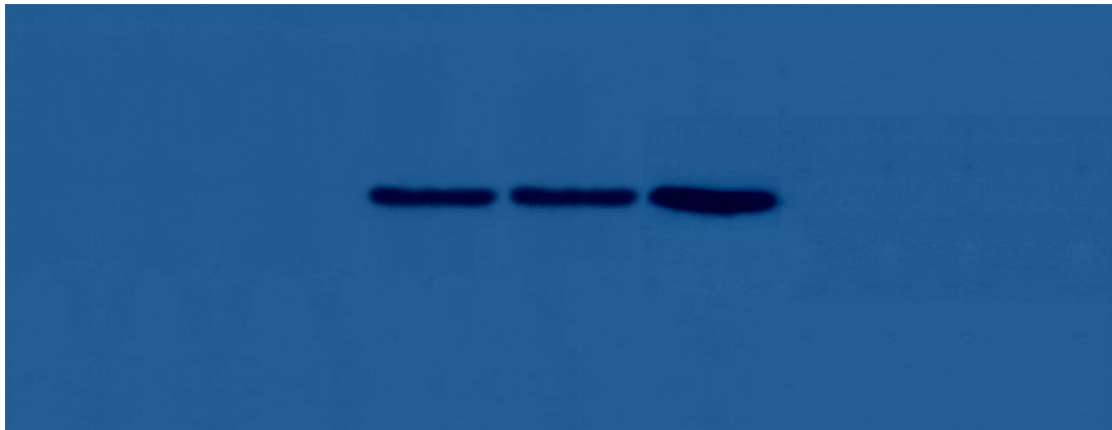

**Fig.9A-3** full blot image of PAK2

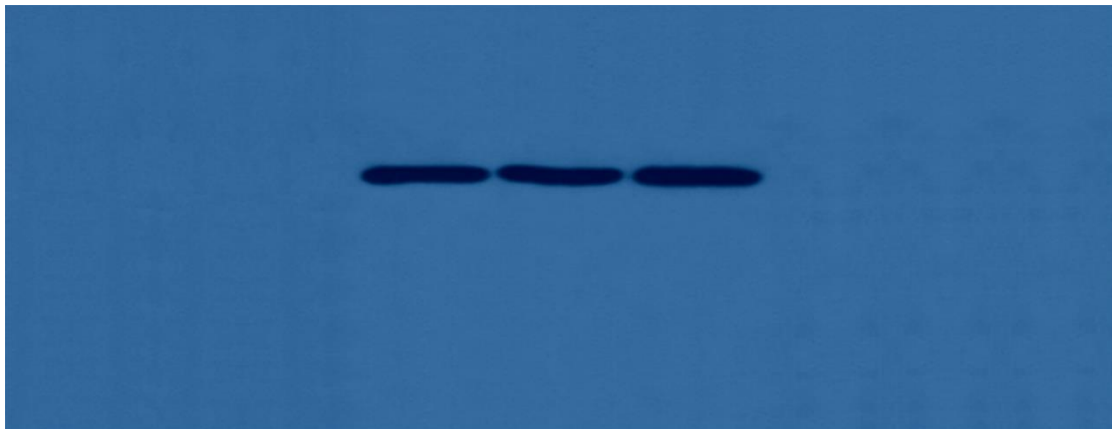

Fig.9A-4 full blot image of PAK3

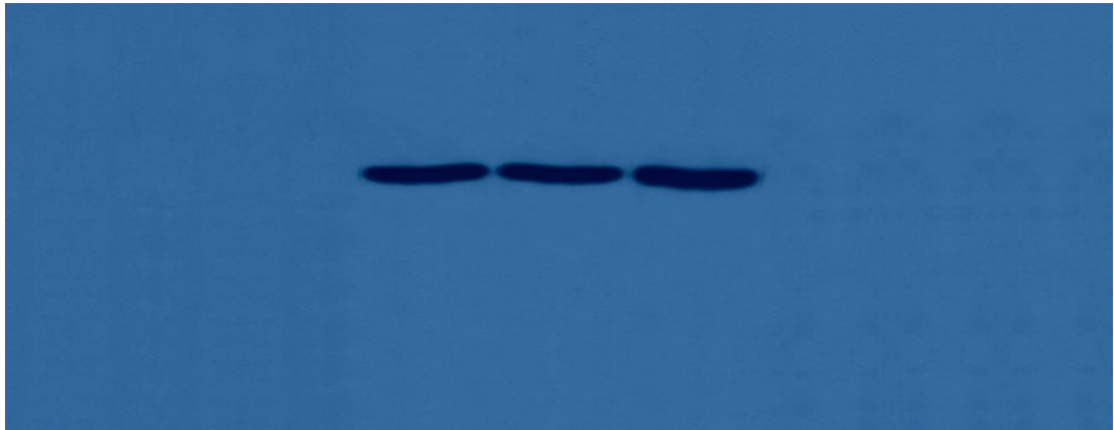

Fig.9A-5 full blot image of B-RAF

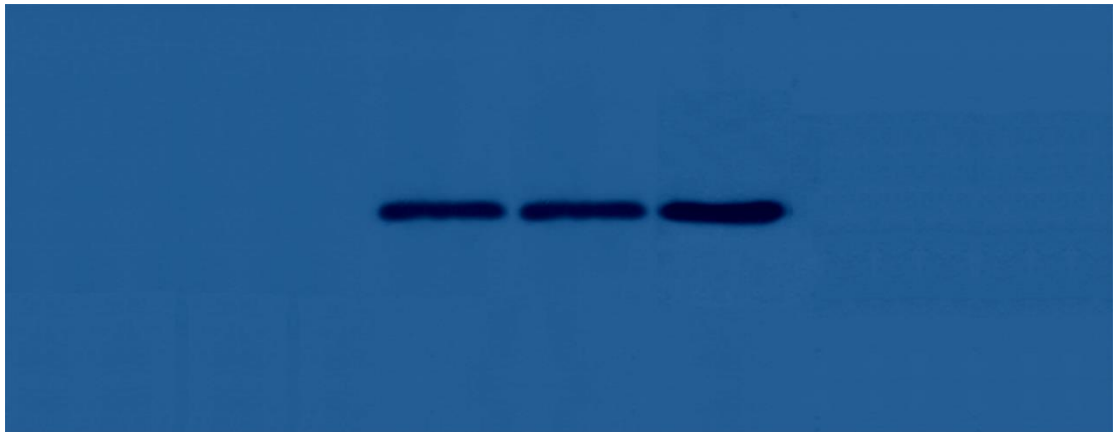

Fig.9A-6 full blot image of RAF1

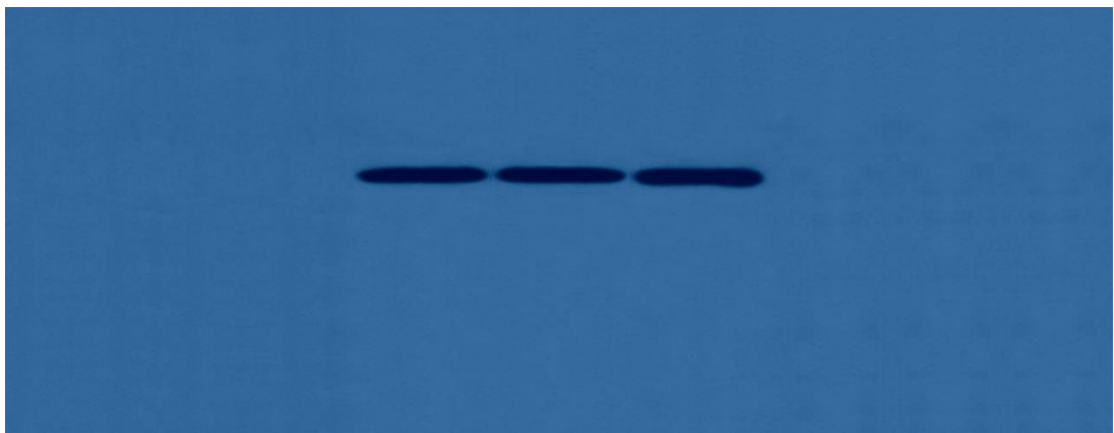

**Fig.9A-7** full blot image of MEK1

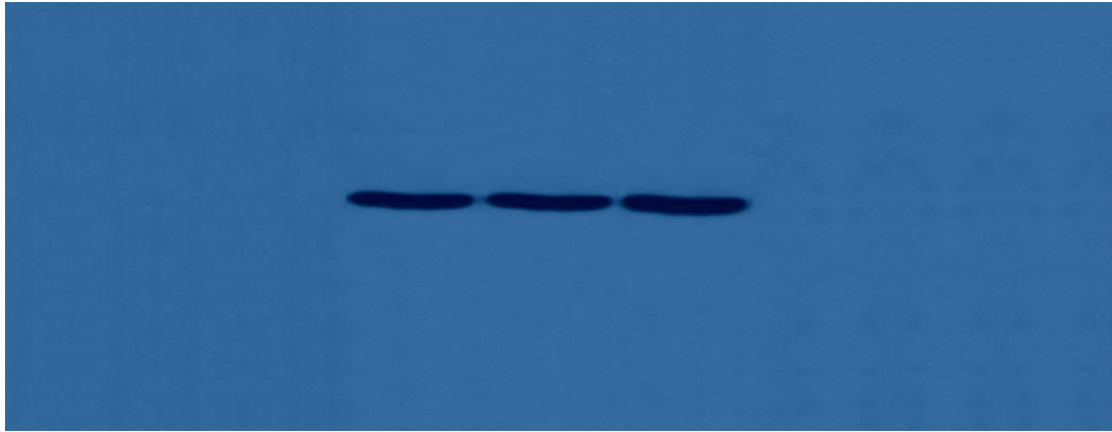

**Fig.9A-8** full blot image of MEK2

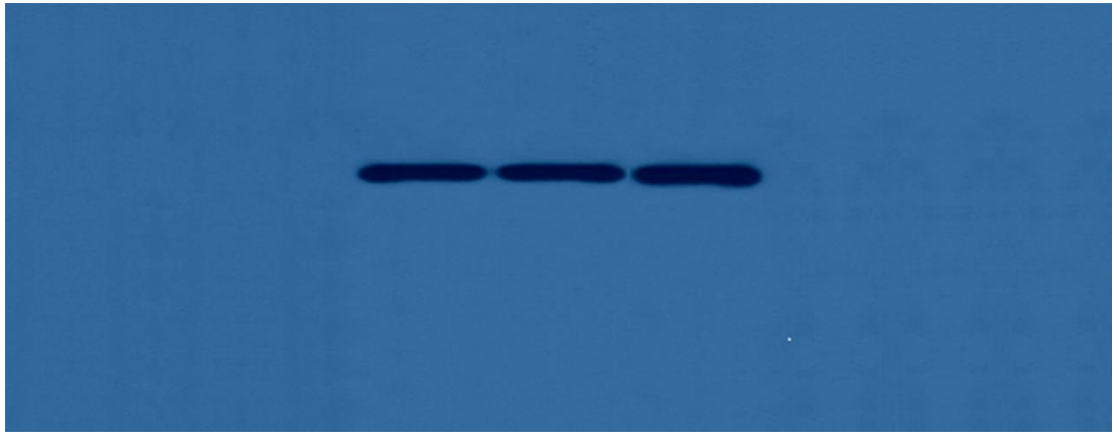

**Fig.9A-9** full blot image of ERK1/2

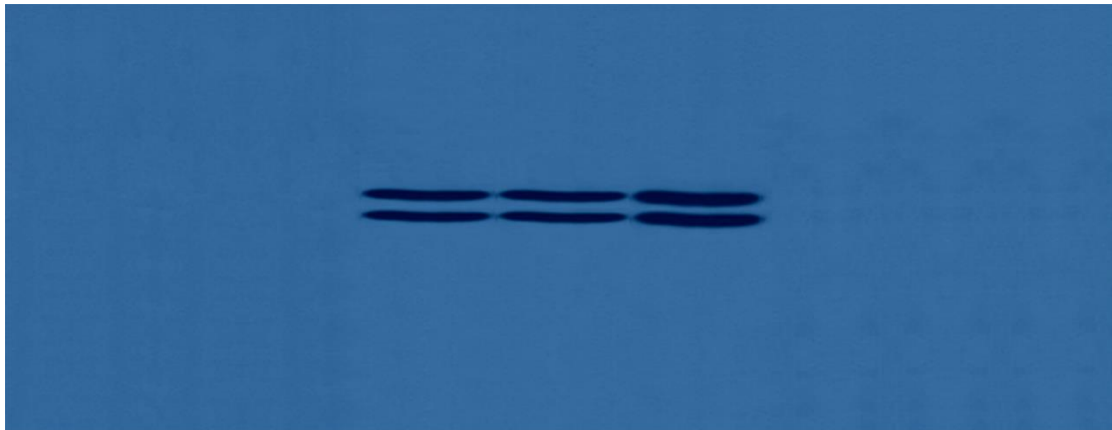

Original images for B-RAF and RAF1 expression in the GCs before and after RNAi. The manipulated versions are reported in Fig. 10 of the manuscript.

**Fig. 10B-1** full blot image of B-RAF

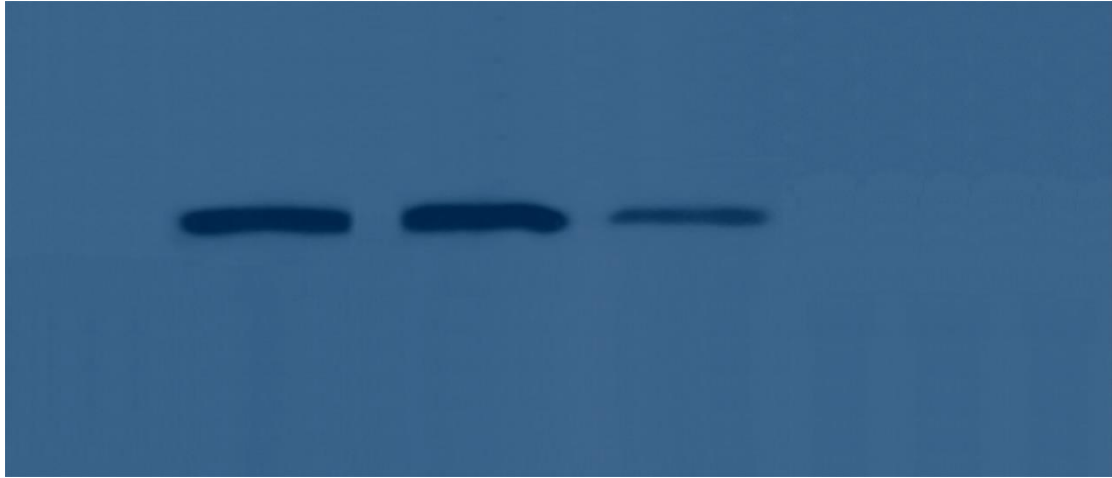

**Fig. 10B-2** full blot image of RAF1

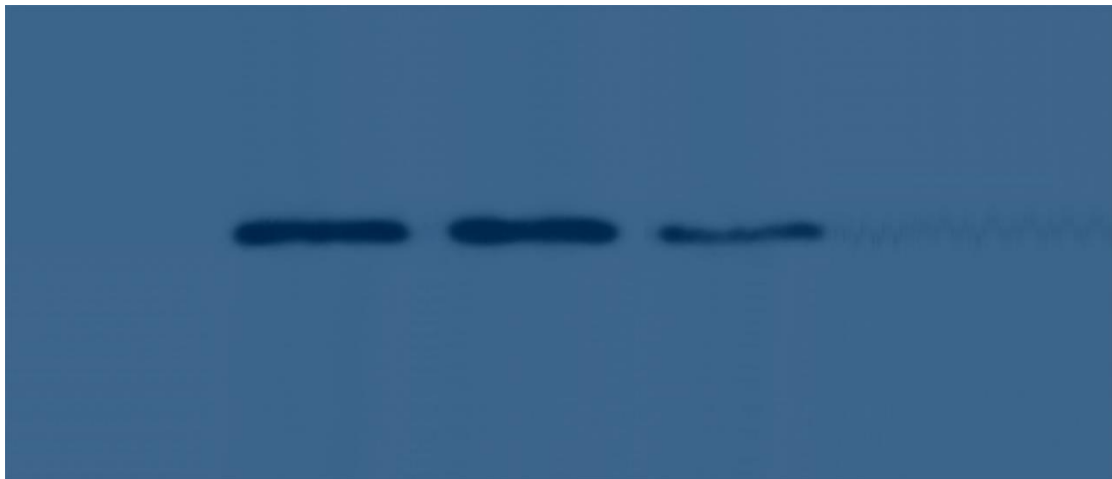

**Fig. 10B-3** full blot image of beta-actin

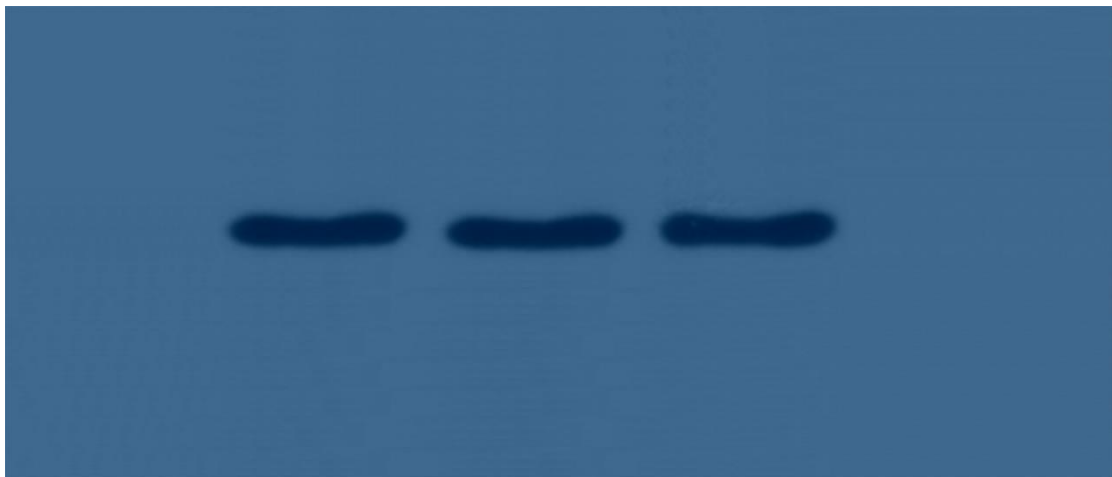

Supplement: 41598_2018_27601_MOESM1_ESM.pdf [file 41598_2018_27601_MOESM1_ESM.pdf]
